# Supplementary material
Source: publisher figshare collection journal article supplement (https://rs.figshare.com/ndownloader/files/38311021)
Supplement: Supplementary file 1 [file 38311021]

# Supplementary Materials:

## When did you stop speaking to yourself? Age-related differences in adolescents' world knowledge-based audience design

Caroline Arvidsson<sup>1</sup>, David Pagmar<sup>1</sup>, and Julia Uddén<sup>1,2</sup>

<sup>1</sup>Dept. of Linguistics, Stockholm University

<sup>2</sup>Dept. of Psychology, Stockholm University

### TABLE OF CORRELATIONS

Spearman's rank-based correlation for the study's continuous variables. As expected, the two EF scores (Perseverative and Non-perseverative errors) correlated significantly. A significant negative correlation was observed between Perseverative errors and KAS. This negative correlation is not further discussed, as it is not the focus of our study and because of an outlier (over 3 standard deviations from the mean) that may have affected the results (see the right bottom corner of the Perseverative errors/KAS scatter plot).

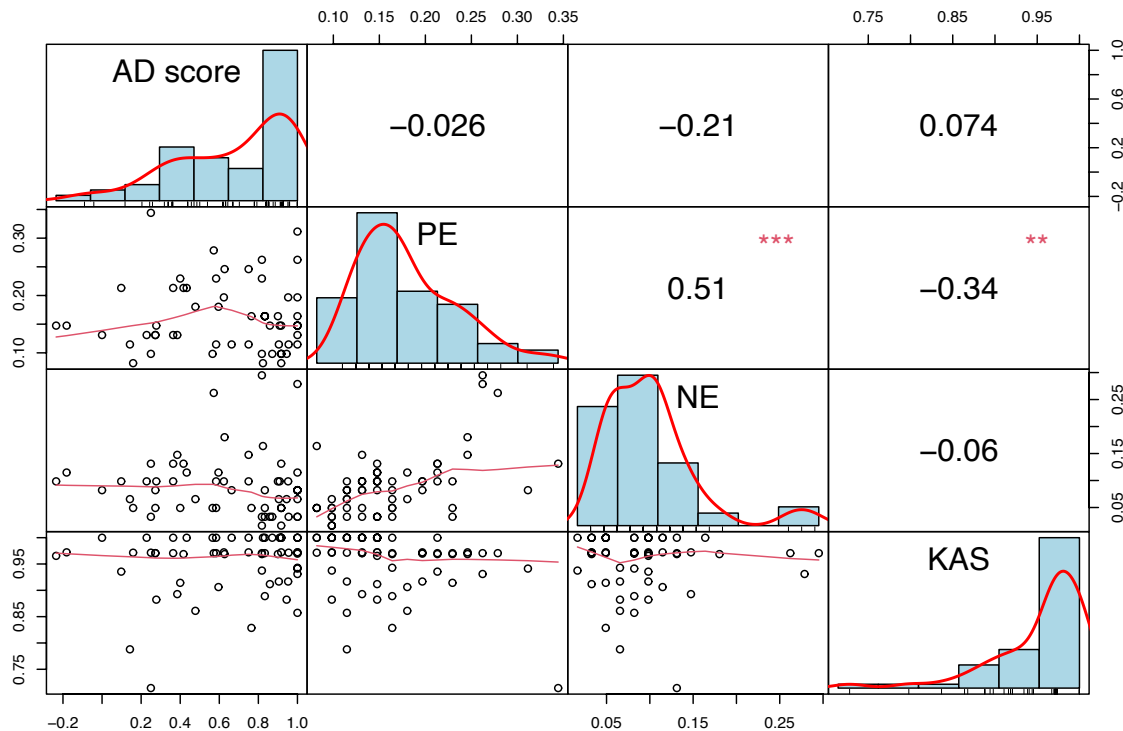

**Figure S1.** A correlation matrix, with measure histograms and scatter plots, including (1) AD score, representing ability to adapt utterances to suit one's addressee, (2) perseverative errors (PE), representing executive function and ability to flexibly switch matching rule after set-shift in the WCST, (3) non-perseverative errors (NE), representing executive function and ability to maintain a correct matching behavior during a set in the WCST, and (4) KAS (knowledge attribution score), representing how well the participant's assumptions about their addressee's knowledge states matched the conditions. No score was transformed or centered. The matrix was with the R package PerformanceAnalytics [1]).

## TARGET AND COMPETITOR REFERENTS

Items used in the AD task. The selection of referents was based on a pre-test survey with six 11-year-olds (not participants in the main study), who answered questions whether they believed the name of the referent to be known or unknown to the addressee. We only included referents in which all participants agreed that the referent was known or unknown to the addressee. In the AD task, to provide referential expressions that successfully distinguished targets from competitors, no more than a noun phrase with a maximum of one modifier (an adjectival or prepositional phrase) was necessary.

**Table S1.** Translated examples (from Swedish) of descriptions of items in the unknown condition.

| Target                       | Competitors                        | Example of target description    | Addressee |
|------------------------------|------------------------------------|----------------------------------|-----------|
| Minecraft character          | Cartoon figures (none in t-shirt)  | 'The man in t-shirt'             | Elderly   |
| Ariana Grande                | Short-haired women                 | 'The woman with long hair'       | Elderly   |
| Black Xbox console           | Colored boxes                      | 'The black box/console'          | Elderly   |
| BTG (7 member band)          | Bands of maximum 3 people          | 'Seven/many people'              | Elderly   |
| Charizard (pokémon)          | Drawed dinosaurs                   | 'The dinosaur with a fire tail'  | Elderly   |
| Jockiboi (influencer)        | Brown-haired men                   | 'The blond man'                  | Elderly   |
| Jonna (influencer)           | Brown-haired women                 | 'The blond woman'                | Elderly   |
| Nintendo switch              | Consoles with colored buttons      | 'The control with black buttons' | Elderly   |
| Pokéball                     | Balls in various colors            | 'The white and red ball'         | Elderly   |
| Snapchat logo (ghost-shaped) | Other minimalistic logos           | 'The ghost'                      | Elderly   |
| TikTok logo                  | Logos in various colors            | 'The note/The black logo'        | Elderly   |
| The red angry bird           | Birds (none red)                   | 'The red bird'                   | Elderly   |
| Twitter logo                 | Birds (none blue)                  | 'The blue bird'                  | Child     |
| BankID logo (D-shaped)       | Minimalistic logos (none D-shaped) | 'The letter D'                   | Child     |
| Einar (musician)             | Men i colorful clothes             | 'The man in black clothes'       | Child     |
| Instagram logo               | Various symbols                    | 'The camera'                     | Child     |
| Law book                     | Books (none blue)                  | 'The blue book'                  | Child     |
| Barrack Obama                | Blond/grey-haired men              | 'The man with black hair'        | Child     |
| Swedish passport             | Books and booklets (none red)      | 'The red booklet'                | Child     |
| Stefan Löfvén (politician)   | Blond men                          | 'The man with brown hair'        | Child     |
| Donald Trump                 | Dark-haired men                    | 'The blond man'                  | Child     |
| Facebook Messenger Logo      | Logos (none were blue circles)     | 'The blue circle'                | Child     |
| The Facebook logo            | Logos (none blue)                  | 'The blue logo'                  | Child     |
| Calculator                   | Devices (none with black buttons)  | 'The thing with blue buttons'    | Child     |

**Table S2.** Translated examples (from Swedish) of descriptions of items in the known condition.

| Target                         | Competitors                      | Example of target description | Addressee |
|--------------------------------|----------------------------------|-------------------------------|-----------|
| Christmas tree                 | Generic trees                    | 'The tree with a star'        | Elderly   |
| Lucia (religious figure)       | Women (none holding candles)     | 'The woman with candles'      | Elderly   |
| Eiffel tower                   | Buildings (none in parks)        | 'The building in the park'    | Elderly   |
| Sun                            | Geometric symbols (none yellow)  | 'The yellow thing'            | Elderly   |
| Lussekatt (pastry)             | Raisin-free pastries             | 'The pastry with raisins'     | Elderly   |
| Semla (pastry)                 | Cream-free pastries              | 'The pastry with cream'       | Elderly   |
| Santa Claus                    | Men without beards               | 'The bearded man'             | Child     |
| Ginger bread                   | Cookies (none were heart-shaped) | 'The heart-shaped cookies'    | Child     |
| Bamse (Cartoon character)      | Drawed bears (none in blue hat)  | 'The bear with a blue hat'    | Child     |
| Lilleskutt (Cartoon character) | White-tailed bunnies             | 'The bunny with a pink tail'  | Child     |
| Star                           | Geometric shapes (none yellow)   | 'The yellow symbol'           | Child     |
| Pippi Longstocking             | Girls (none with braids)         | 'The girl with braids'        | Child     |

### MODEL 3 (WITH AGE \* EF INTERACTION)

To account for the possibility that the role of EF in referential production varies across ages, as discussed in [2], we performed an additional test (Model 3) which included the interaction Age group \* Perseverative errors. Note that the presence or absence of interaction terms in the models did not change the results in any notable way. The interaction term was not significant and the main effects remained intact.

**Table S3.** Output from Model 3, which included the interaction AGE GROUP \* Perseverative errors.

|                                  | Estimate | Std. Error | t value | p value |
|----------------------------------|----------|------------|---------|---------|
| Age group                        | 1.00     | 0.26       | 3.81    | .001    |
| Perseverative errors             | 0.85     | 3.28       | 0.26    | .796    |
| Non-perseverative errors         | 1.61     | 2.63       | 0.61    | .543    |
| KAS                              | 1.16     | 2.14       | 0.54    | .588    |
| Age group * Perseverative errors | 4.13     | 4.39       | 0.94    | .350    |

### POWER ANALYSIS FOR MODEL 3

An additional power analysis for multiple linear regression was conducted with the `pwr.f2.test` function in the 'pwr' package [3]. The analysis shows that for a model including all four predictors (Age group, Perseverative errors, Non-perseverative errors, KAS), plus one additional interaction variable (Age group \* Perseverative errors) with an  $\alpha = 0.05$  and power = 0.8, the required sample size is approximately  $N = 38$ . The sample size of the current study ( $N = 58$ ) is therefore determined sufficient, also for this model.

### REFERENCES

1. Peterson BG, Carl P, Boudt K, Bennett R, Ulrich J, Zivot E, Lestel M, Balkissoon K, and Wuertz D. PerformanceAnalytics: Econometric tools for performance and risk analysis. R package version 2014; 1
2. Matthews D, Biney H, and Abbot-Smith K. Individual Differences in Children's Pragmatic Ability: A Review of Associations with Formal Language, Social Cognition, and Executive Functions. Language Learning and Development 2018; 14:186–223. DOI: 10.1080/15475441.2018.1455584
3. Champely S, Ekstrom C, Dalgaard P, Gill J, Weibelzahl S, and Anandkumar A. pwr: Basic Functions for Power Analysis. R package version 1.2-2. Computer software]. Retrieved from <https://CRAN.R-project.org/package=pwr> 2018
